# Supplementary material for: Volumetric Scalability of Microfluidic and Semi-Batch Silk Nanoprecipitation Methods
Source: MDPI journal article supplement (doi:10.3390/molecules27072368), 2022-04-06
Supplement: s1 [file s1]

## Supporting Information

*Saphia A. L. Matthew,<sup>†</sup> Refaya Rezwan,<sup>‡,§</sup> Yvonne Perrie<sup>†</sup> and F. Philipp Seib<sup>\*,†,§</sup>*

\* Corresponding author: Tel: +44 (0) 141 548 2510; E-mail: [philipp.seib@strath.ac.uk](mailto:philipp.seib@strath.ac.uk).

<sup>†</sup> Strathclyde Institute of Pharmacy and Biomedical Sciences, University of Strathclyde, 161 Cathedral Street, Glasgow, G4 0RE,  
U.K.

<sup>‡</sup> Department of Pharmacy, ASA University Bangladesh, 23/3 Bir Uttam A.N.M Nuruzzaman Sarak, Dhaka 1207, Bangladesh.

<sup>§</sup> School of Clinical Sciences, Faculty of Medicine, Nursing and Health Sciences, Monash University, Clayton, Victoria 3168,  
Australia.

<sup>§</sup> EPSRC Future Manufacturing Research Hub for Continuous Manufacturing and Advanced Crystallisation (CMAC), University of  
Strathclyde, Technology and Innovation Centre, 99 George Street, Glasgow G1 1RD, U.K.

Number of pages: S1-S4

Number of tables: S1-S5

Table S1. Estimated flow characteristics of the syringes used in the open semi-batch system.

| Syringe / mL | Volume / mL | Flow rate / mL min <sup>-1</sup> | Residence time / s | Critical work / 10 <sup>-3</sup> Pa | Maximum shear rate / s <sup>-1</sup> | Volumetric flow rate / 10 <sup>-10</sup> m <sup>3</sup> s | Average velocity / 10 <sup>-5</sup> m s <sup>-1</sup> | Cross-sectional area / 10 <sup>-5</sup> m <sup>2</sup> | R <sub>e</sub> |
|--------------|-------------|----------------------------------|--------------------|-------------------------------------|--------------------------------------|-----------------------------------------------------------|-------------------------------------------------------|--------------------------------------------------------|----------------|
| 3            | 1           | 1.000                            | 18                 | 33.2                                | 0.261                                | 167                                                       | 28.3                                                  | 5.89                                                   | 0.093          |
|              | 0.3         |                                  | 60                 | 111                                 |                                      |                                                           |                                                       |                                                        |                |
| 10           | 3.65        | 1.000                            | 219                | 18.3                                | 0.0557                               | 1667                                                      | 10.1                                                  | 165                                                    | 0.055          |
|              | 6           |                                  | 360                | 30.1                                |                                      |                                                           |                                                       |                                                        |                |
|              | 7           |                                  | 420                | 35.2                                |                                      |                                                           |                                                       |                                                        |                |
| 50           | 23          | 1.000                            | 1380               | 2.96                                | 0.00892                              | 1667                                                      | 2.98                                                  | 56.0                                                   | 0.030          |

Table S2. Estimated flow characteristics of the reactors used in the open semi-batch system.

| Volumetric Scale / mL | Volume / mL | R <sub>e</sub>      | Power per volume <sup>d</sup> / W m <sup>-3</sup> | Average shear rate / s <sup>-1</sup> | Energy dissipation / W kg <sup>-1</sup> | Integrated shear factor / s <sup>-1</sup> |
|-----------------------|-------------|---------------------|---------------------------------------------------|--------------------------------------|-----------------------------------------|-------------------------------------------|
| 6                     | 5           | 3066 <sup>a,c</sup> | 291                                               | 155,177                              | 0.37                                    | 494 <sup>e</sup>                          |
|                       |             |                     |                                                   |                                      |                                         | 263 <sup>f</sup>                          |
|                       | 6           | 2514 <sup>a,b</sup> | 242                                               | 113,442                              | 0.29                                    | 494 <sup>e</sup>                          |
|                       |             |                     |                                                   |                                      |                                         | 263 <sup>f</sup>                          |
| 36                    | 30          | 3066 <sup>a,c</sup> | 48                                                | 25,863                               | 0.06                                    | 329 <sup>e</sup>                          |
|                       |             |                     |                                                   |                                      |                                         | 132 <sup>f</sup>                          |
|                       | 36          | 2514 <sup>a,b</sup> | 40                                                | 18,907                               | 0.05                                    | 329 <sup>e</sup>                          |
|                       |             |                     |                                                   |                                      |                                         | 141 <sup>f</sup>                          |

a. Determined using the frequency of 42 rps, stir bar dimensions of 15 × 6 mm.

b. Determined using the dynamic viscosity (0.0032 kg ms<sup>-1</sup>) and density (837 kg m<sup>-3</sup>) of the 5:1 mixture of silk precursor: isopropanol.

- c. Determined using the dynamic viscosity ( $0.0024 \text{ kg ms}^{-1}$ ) and density ( $785 \text{ kg m}^{-3}$ ) of isopropanol.
- d. Calculated using the maximum power number of the stir bar (3.04) and power drawn (0.00145 W).
- e. Determined using the reactor diameter for 6 mL scale (23 mm) and 36 mL scale (27 mm) at the top surface of the stir bar.
- f. Determined using the reactor diameter for 6 mL scale (30 mm) and 36 mL scale (43–45 mm) at the isopropanol air-liquid interface.

**Table S3. Droplet characteristics impacting flow and mixing-induced silk self-assembly.  $\pm$  SD,  $n = 3$ .**

| Height / cm | Flow rate / $\text{mL min}^{-1}$ | Number of drops / $\text{mL}^{-1}$ | Droplet Volume / $\mu\text{L}$ | Droplet diameter / mm | Diffusion length scale <sup>a</sup> / $\mu\text{m}$ | Diffusion time scale <sup>a</sup> / s | Time of flight / s | Droplet velocity / $\text{m s}^{-1}$ | Fluid velocity / $\text{mm s}^{-1}$ |
|-------------|----------------------------------|------------------------------------|--------------------------------|-----------------------|-----------------------------------------------------|---------------------------------------|--------------------|--------------------------------------|-------------------------------------|
| 7.5         | 1.000                            | $18 \pm 1$                         | $56.6 \pm 1.9$                 | $3.38 \pm 0.10$       | $40.1 \pm 0.4$                                      | $780 \pm 48.0$                        | $0.110 \pm 0.002$  | $0.918 \pm 0.020$                    | $26 \pm 14$                         |

- a. Determined using the droplet diameter, droplet time of flight and the silk diffusion coefficient of  $2.45 \times 10^5 \text{ cm}^2 \text{ s}^{-1}$ [65].

**Table S4. Participant and precision statistics of the round robin study.**

| Physicochemical property | $\bar{x}$ | $s_{\bar{x}}$ | $s_r$ | $s_R$ | $r$  | $R$  |
|--------------------------|-----------|---------------|-------|-------|------|------|
| Size / nm                | 109       | 4             | 17    | 6     | 13   | 17   |
| PDI                      | 0.11      | 0.02          | 0.02  | 0.03  | 0.06 | 0.09 |
| Zeta Potential / mV      | -32       | 2             | 3     | 4     | 5    | 11   |
| Yield / %                | 14        | 2             | 3     | 4     | 2    | 4    |
| Crystallinity / %        | 58        | 1             | 1     | 2     | 7    | 11   |

Table S5. First cycle simultaneous thermal analysis data of silk nanoparticles manufactured at different stirring rates. Data has been published elsewhere[30].

| Thermal Property |                                     | Semi-batch                 |                    |
|------------------|-------------------------------------|----------------------------|--------------------|
|                  |                                     | Stirring rate / <i>rpm</i> |                    |
|                  |                                     | 0                          | 400                |
| DSC              | T <sub>g</sub> / °C                 | 59.3 ± 0.01                | 59.3 <sup>a</sup>  |
|                  | T <sub>d</sub> / °C                 | 39.1 ± 5.3                 | 43.6 ± 13.9        |
|                  | ΔH <sub>d</sub> / J g <sup>-1</sup> | -207.8 ± 98.0              | -239.4 ± 18.8      |
|                  | T <sub>g</sub> ' / °C               | -                          | 206.0 <sup>a</sup> |
|                  | T <sub>c</sub> / °C                 | -                          | -                  |
|                  | ΔH <sub>c</sub> / J g <sup>-1</sup> | -                          | -                  |
|                  | T <sub>o</sub> / °C                 | 274.0 ± 0.3                | -                  |
|                  | T <sub>dec</sub> / °C               | 289.5 ± 0.5                | 268.9 ± 9.0        |
| TGA              | Water content / % (w/w)             | 13.0 ± 1.7                 | 284.2 ± 7.7        |
|                  | T <sub>o</sub> / °C                 | 277.3 ± 0.2                | 12.6 ± 2.0         |
|                  | T <sub>o</sub> ' / °C               | -                          | 274.3 ± 3.8        |
|                  | T <sub>dec</sub> / °C               | 299.6 ± 6.6                | -                  |
|                  | T <sub>dec</sub> ' / °C             | -                          | 304.0 ± 4.6        |

a.  $n = 1$
